1 **Rising prevalence of *Plasmodium falciparum* artemisinin resistance mutations in**  
2 **Ethiopia**

3 Bokretzion G. Brhane<sup>1,2\*</sup>, Abebe A. Fola<sup>3,4\*</sup>, Helen Nigussie<sup>2</sup>, Alec Leonetti<sup>3</sup>, Moges  
4 Kassa<sup>1</sup>, Henok Hailgiorgis<sup>1</sup>, Yonas Wuletaw<sup>1</sup>, Adugna Abera<sup>1</sup>, Hussein Mohammed<sup>1</sup>,  
5 Heven Sime<sup>1</sup>, Abeba G/Tsadik<sup>1</sup>, Gudissa Assefa<sup>9</sup>, Hiwot Solomon<sup>9</sup>, Geremew Tasew<sup>1</sup>,  
6 Getachew Tollera<sup>1</sup>, Mesay Hailu<sup>1</sup>, Jonathan J. Juliano<sup>5,6,7,8</sup>, Ashenafi Assefa<sup>1,4</sup>,  
7 Jonathan B. Parr<sup>5,6,7#</sup> and Jeffrey A. Bailey<sup>3,4#</sup>

8  
9 1 Ethiopian Public Health Institute, Addis Ababa, Ethiopia  
10 2 Department of Microbial, Cellular, and Molecular Biology, Addis Ababa University,  
11 Addis Ababa, Ethiopia  
12 3 Department of Pathology and Laboratory Medicine, Brown University, Providence, RI,  
13 USA  
14 4 Center for Computational Molecular Biology, Brown University, Providence, RI, USA  
15 5 Institute for Global Health and Infectious Diseases and Division of Infectious  
16 Diseases, Department of Medicine, University of North Carolina at Chapel Hill, Chapel  
17 Hill, NC, USA  
18 6 Division of Infectious Diseases, School of Medicine, University of North Carolina at  
19 Chapel Hill, Chapel Hill, NC, USA  
20 7 Curriculum in Genetics and Molecular Biology, School of Medicine, University of North  
21 Carolina at Chapel Hill, Chapel Hill, NC, USA  
22 8 Department of Epidemiology, Gillings School of Global Public Health, University of  
23 North Carolina at Chapel Hill, Chapel Hill, NC, USA  
24 9 Ministry of Health, Addis Ababa, Ethiopia

25  
26  
27

28

29

## 30 Abstract

31 Ethiopia is striving to eliminate local malaria transmission by 2030, despite a recent  
32 resurgence of malaria cases due to multiple factors. A significant contributor to this  
33 resurgence could be drug resistance, particularly the emergence of partial resistance to  
34 artemisinin (ArtR) in Ethiopia and other regions of Eastern Africa. This situation  
35 highlights the necessity for genomic surveillance to monitor relevant drug resistance  
36 markers. This study reports sentinel site-based genomic surveillance results for *P.*  
37 *falciparum* antimalarial drug resistance mutations. From 2019 to 2022, dried blood spots  
38 (DBS) were collected from febrile outpatients  $\geq 1$  year of age with microscopically  
39 confirmed falciparum malaria at 12 sentinel sites across 5 regions. Molecular inversion  
40 probe (MIP) sequencing targeted mutations associated with artemisinin and partner  
41 drug resistance, including *k13*, *mdr1*, *crt*, *dhfr*, and *dhps* genes, along with genome-  
42 wide markers to assess the complexity of infection (COI) and parasite relatedness. A  
43 total of 1,199 falciparum-positive patients were assessed, with a median age of 20  
44 years (IQR: 14-30) and including 463 (38.6%) females. The WHO-validated K13 R622I  
45 mutation had a high but regionally variable prevalence (15.7%, range 0-58.8%). The  
46 validated K13 A675V mutation was detected for the first time in Ethiopia in the  
47 Gambella Region (4.5%), as well as P441L and P574L mutations were detected at low  
48 frequencies in Southern and Oromia Regions, respectively. Several partner drug  
49 resistance markers were identified, with mutations in MDR1(184F), DHPS, DHFR, and  
50 CRT nearly fixed across the country. Most samples (87.2%) were monogenic infections  
51 (COI=1) and showed high genetic relatedness, particularly within the health facilities.  
52 Principal component analysis revealed regional clustering of parasites, particularly in  
53 Gambella. The prevalence of K13 R622I across the country and the presence of  
54 multiple additional ArtR markers emphasizes the urgent need for rigorous monitoring of  
55 artemisinin combination therapy (ACT) efficacy to detect partner drug resistance and  
56 ACT failure early and its impact on malaria resurgence in Ethiopia.

57

58

59

## 60 Keywords

61 Malaria, *Plasmodium falciparum*, drug resistance, genomics, sentinel site, Ethiopia

62

63

64

65

66

67

68

69

70

71

## 72 Background

73 Malaria remains a significant public health challenge in Africa, accounting for  
74 approximately 95% of malaria cases and 96% of malaria deaths, predominantly  
75 affecting children under five and pregnant women<sup>1</sup>. Despite notable progress through  
76 the use of artemisinin-based combination therapies (ACTs), vector control measures,  
77 and vaccines like RTS,S, the path to eliminating malaria faces formidable obstacles<sup>2,3</sup>.  
78 These challenges include the emergence of drug- and diagnostic-resistant parasites<sup>4-7</sup>,  
79 insecticide-resistant mosquitoes<sup>8</sup>, new invasive mosquito species<sup>9</sup>, inadequate  
80 healthcare infrastructure, and funding gaps<sup>10</sup>. Resistance to artemisinin poses a  
81 particular threat to the efficacy of ACTs in Africa<sup>11,12</sup> and progress towards malaria  
82 elimination, highlighting the need for new strategies to define and mitigate the impact of  
83 antimalarial resistance.

84  
85 Artemisinin partial resistance (ArtR) was first reported in western Cambodia in  
86 Southeast Asia in 2006-2007<sup>13,14</sup> and has since spread or emerged independently in  
87 other countries in the Greater Mekong Subregion<sup>15</sup>, South America<sup>16</sup>, and recently in  
88 Eastern Africa<sup>17-19</sup> and the Horn of Africa<sup>5,20</sup>. The rise of ArtR WHO-validated markers  
89 have been confirmed in Ethiopia<sup>5</sup>, Eritrea<sup>20</sup>, Rwanda<sup>17</sup>, Uganda<sup>21</sup>, Tanzania<sup>6</sup>, and  
90 Democratic Republic of the Congo (DRC)<sup>22</sup>. ArtR likely accelerates the emergence of  
91 resistance to partner drugs<sup>23</sup>, and once combined with partner drug resistance lead to  
92 significant clinical failure in Southeast Asia. Frank partner drug resistance mutations  
93 have not been found in Africa. Amino acid polymorphisms in the multidrug resistance  
94 protein 1 (MDR1) and chloroquine resistance transporter (CRT) are well established  
95 and partially effect susceptibility diametrically to both amodiaquine and possibly  
96 lumefantrine<sup>24</sup>, which are the most common partner drugs used in ACTs in Ethiopia and  
97 most of Africa. This decreased susceptibility likely further undermines ACTs increasing  
98 the potential for emergence of other mutations<sup>4,6</sup>.

99  
100 Despite Ethiopia's gains in malaria control over the past two decades, the country faces  
101 increasing malaria cases in various regions, in the setting multiple challenges: First, the  
102 K13 622I mutation, a validated marker of partial artemisinin resistance, has been found  
103 at significant frequencies, particularly in the north of the country<sup>5</sup>. Second, the rise of *P.*  
104 *falciparum* strains with *hrp2* and *hrp3* gene deletions complicates the reliability of rapid  
105 diagnostic tests (RDTs), contributing to diagnostic failures and potentially increasing  
106 transmission<sup>5,7</sup>. Third, invasive urban-adapted mosquito species<sup>9,25</sup>, and increasing  
107 insecticide resistance threaten malaria control efforts<sup>26</sup>. Fourth, environmental and man-  
108 made factors such as climate change<sup>27</sup>, conflict, and population movement may have  
109 facilitated the spread of malaria, contributing to the recent resurgence. Gaps in  
110 surveillance systems hinder effective tracking of disease patterns and resistance trends  
111 and understanding the role of these challenges in malaria resurgence. Dissecting and

112 addressing these challenges requires enhanced surveillance, robust diagnostic tools,  
113 and innovative strategies to track and mitigate the spread of drug-resistant strains to  
114 achieve elimination goals<sup>28</sup>. Genomic surveillance of molecular markers of resistance  
115 and understanding the genomic diversity of the parasite will be critical<sup>29</sup>. Such  
116 surveillance helps identify resistance hotspots and informs targeted interventions such  
117 as deployment of sequential or triple ACT regimens, contributing to more effective  
118 malaria control and elimination strategies<sup>30,31</sup>.

119

120 Integrating genomic data with routine surveillance systems for timely tracking of  
121 emerging and spreading resistance is crucial<sup>32,33</sup>. To this end, the Ethiopian Public  
122 Health Institute (EPHI), in collaboration with the national malaria control and elimination  
123 program, established a network of sentinel sites representative of the diverse malaria  
124 transmission ecologies across the country. These sites collect and analyze data on  
125 malaria transmission dynamics, treatment efficacy, and resistance patterns, providing  
126 opportunities for evidence-based decision-making in near real-time. These sentinel sites  
127 are integral to Ethiopia's broader malaria control and elimination strategy, which aims to  
128 reduce the disease's burden through early detection, targeted treatment, and prevention  
129 efforts. This study reports an in-depth analysis of the emergence and spread of drug  
130 resistance mutations and parasite relatedness using molecular inversion probe (MIP)  
131 sequencing of samples collected from 12 sentinel sites across the country.

132

## 133 **Results**

### 134 **Study population**

135 After filtering, 855 of 1,199 samples were included in the analysis sample set (**Figure**  
136 **S1**). Samples came from participants enrolled at all 12 sentinel site health facilities  
137 (**Figure 1A**) across five regions (Amhara = 270, Gambella = 131, Oromia = 193, SNNP  
138 = 221, Somali = 40) (**Figure 1B**). The median parasite density of sequenced samples  
139 was 2,000 parasites/ $\mu$ L (range 48 to 61,000 parasites/ $\mu$ L) by microscopy, with better  
140 sequencing coverage in samples with higher parasitemia (**Figure S1**). Most samples (n  
141 = 767) were collected in 2022 and 79.2% (n = 607) were successfully genotyped, 393  
142 collected in 2019 and 56.9% (n=224) successfully genotyped followed 39 collected in  
143 2023 and 61.5% (n = 24) successfully genotyped. Details of samples successfully  
144 sequenced per each MIP panel summarized in **Table S1** and **Table S2**.

145

146

147

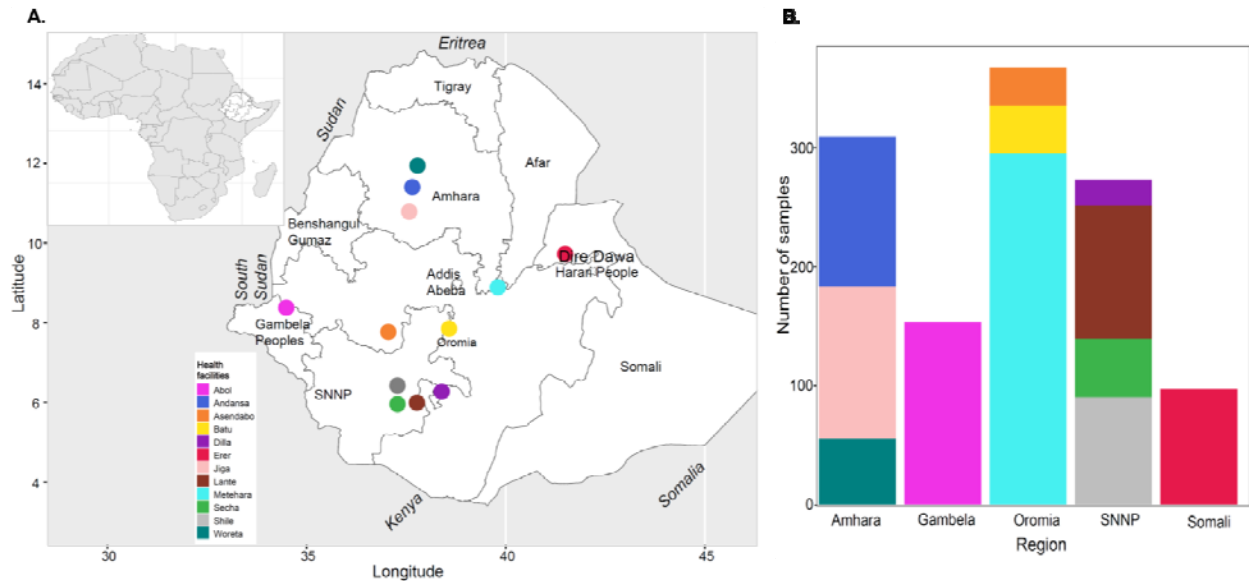

148  
149 **Figure 1. Study sites and sequenced samples. A) Study sites and B) distribution of**  
150 **samples sequenced per health facility and region. Colors indicate individual health**  
151 **facilities.**

## 152 Prevalence and distribution of ArtR mutations

153 We first assessed the prevalence of WHO-validated and candidate K13 ArtR mutations  
154 revealing four WHO validated K13 mutations (**Figure 2A**). K13 R622I was the most  
155 prevalent (15.7% [95% CI 13.2-18.2%]). Its geospatial distribution was heterogeneous  
156 (prevalence range: 0 to 58.8%) at health facility level (**Figure S2**), with highest regional  
157 prevalence in the north (46.9% [95% CI 40.7-53.2%]) in the Amhara region) where it was  
158 first reported at 2.4% in one facility in 2014<sup>34</sup>. K13 R622I was also prevalent in Erer  
159 (12.9%), a Somali region Eastern part of the country, and additionally observed in low  
160 frequency from health facilities from Gambela and Oromia regions but not reported from  
161 health facilities from SNNP (Southern Nations, Nationalities and Peoples) region.

162  
163 Of concern, we found three additional WHO-validated K13 mutations not previously  
164 observed in the Horn of Africa or Ethiopia in the southern half of the country where 622I  
165 is not as prevalent. We found 6 samples with A675V (Gambella Region), 4 samples with  
166 P441L (3 from Southern Region including 2 from Dilla and 1 from Secha health centers,  
167 and 1 from Oromia Region in the Metehara health center) and 5 samples with P574L  
168 (Oromia Region in the Batu health center) (**Table S3**). We also identified an additional  
169 14 non-synonymous mutations within and outside the K13 propeller domain with  
170 variable frequencies (**Figure S3**). Other K13 mutations not associated with ArtR were  
171 found, including K189T at 32% (CI, 27.1- 38.3) prevalence across sites.

## 172 Genetic relatedness of k13 mutant parasites

173 To further elucidate the spatial spread of mutant parasites, we conducted IBD  
174 relatedness analysis and found that there was a higher average IBD sharing estimate  
175 for K13 R622I mutant isolates compared to K13 wild-type isolates (**Figure 2B**). This  
176 was also true for parasites carrying P574L mutations (**Figure S4B**), however, parasites  
177 carrying A675V or P441L did not show significant relatedness and were in fact less  
178 related compared to wildtype (**Figure S4A, C**). We then conducted relatedness network  
179 analysis, using an IBD cut of  $\geq 0.99$  to detect evidence of clonal transmission, finding  
180 clustering mutant parasites clustered into pairs and networks (**Figure 2C**) separate from  
181 wildtype.  
182

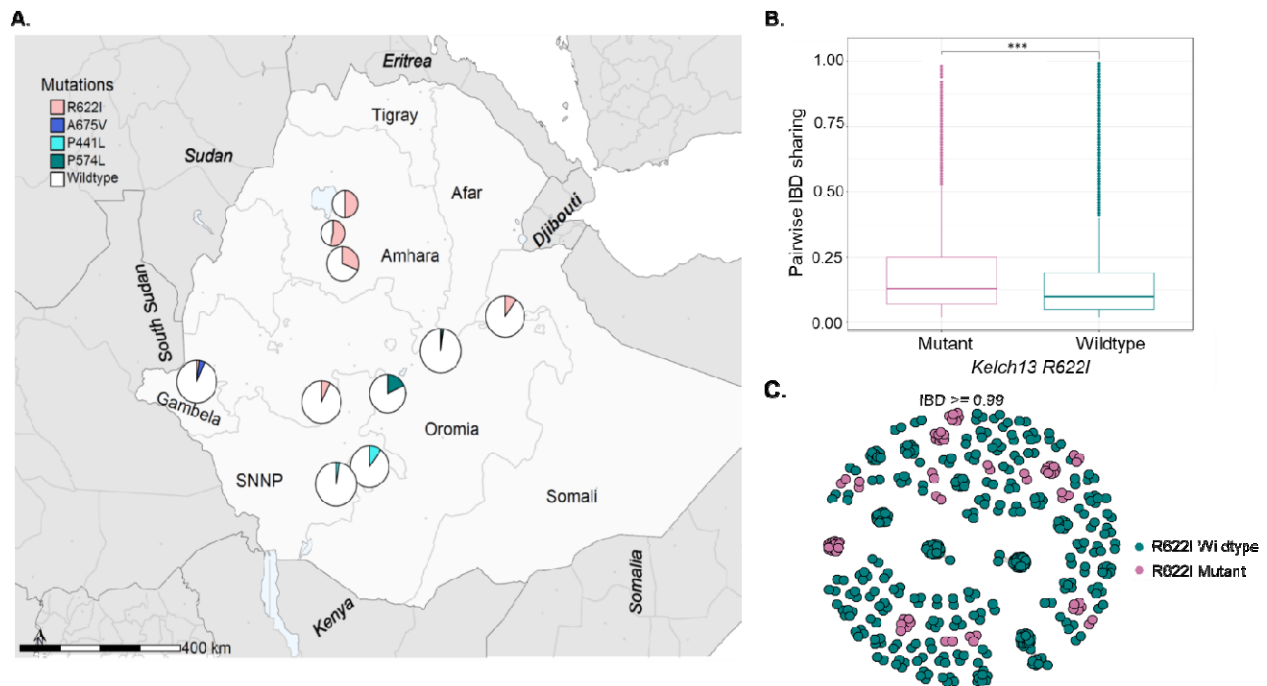

183  
184 **Figure 2. WHO-validated K13 mutation prevalences and relatedness of 622I**  
185 **mutant vs wildtype parasites.** **A)** Spatial distribution of WHO-validated K13 mutations  
186 by health facility (pie charts). Colors indicate which mutation, and pie chart size is  
187 proportional to sample size per study site. **B)** Pairwise IBD sharing within *kelch13* R622I  
188 mutant versus wild parasites, showing \*\*\* significant differences ( $P < 0.001$ , two-  
189 tailed, Mann-Whitney *U*-test). Boxes indicate the interquartile range, the line indicates  
190 the median, the whiskers show the 95% confidence intervals and dots show outlier  
191 values. *P* value determined using Mann-Whitney test is shown. **C)** Network analysis  
192 showing highly related parasite pairs ( $IBD \geq 0.99$ ). Each node identifies a unique isolate,  
193 and an edge is drawn between two isolates if they meet the IBD threshold. Isolates that  
194 do not have a IBD pairwise connection above threshold are not shown. Color codes  
195 correspond to K13 R622I mutant (pink) and wild parasites (blue green).



196  
197  
198  
199

### Prevalence of mutations associated resistance to partner drugs

200 Mutations in the *P. falciparum* multidrug-resistance gene 1 (MDR1), particularly isolates  
201 that carry the N86 (wild), 184F (mutant), and D1246 (wild) haplotype have been  
202 associated with modest decreased susceptibility to lumefantrine (the first line partner  
203 drug in Ethiopia, co-formulated as artemether-lumefantrine). Our analysis revealed that  
204 99.1% ([95% CI 98.4-99.6%]) sequenced samples carried N86 (wild), followed by 98.1%  
205 ([95% CI 97.2-98.9%]) samples of D1246 (wild), and 94.8% ([95% CI 93.4-96.3%])  
206 carrying 184F (mutant) (**Figure 3A**). The overall high prevalence resulted in less spatial  
207 variation at district or health center level (data not shown). Nearly all parasites with the  
208 ArtR K13 R622I (**Figure 3A**) and A567V (**Figure 3B**) mutations also carry the MDR1  
209 NFD haplotype associated with lumefantrine resistance. The co-occurrence of ArtR and  
210 partner drug resistance mutations raises concern about the effectiveness of ACTs in  
211 Ethiopia.

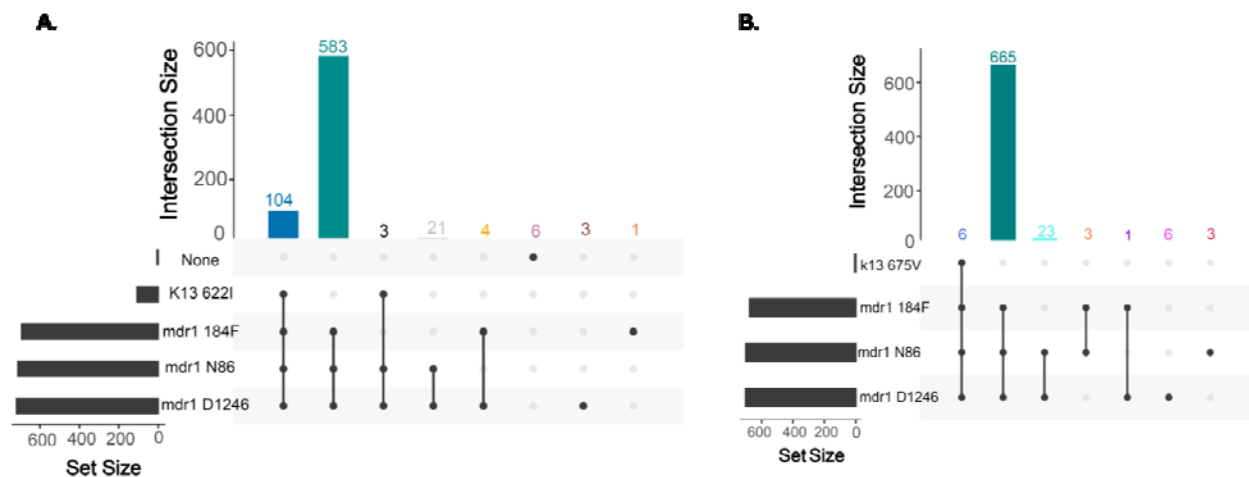

212

213 **Figure 3. Co-occurrence of ArtR and lumefantrine-resistance markers in Ethiopia.**  
214 Number of parasites with **A)** K13 622I and MDR1 N86 (wild), 184F (mutant) and D1246  
215 (wild) and with **B)** K13 675V and MDR1 N86 (wild), 184F (mutant) and D1246 (wild).  
216 Only samples with calls across all loci are shown. For polygenomic infections, the  
217 dominant haplotype ( $\geq 51\%$  allele frequency) is shown.

218

219 We also observed a high prevalence of mutations associated with resistance to  
220 sulfadoxine-pyrimethamine (SP) and chloroquine. SP was discontinued in 2004 and is  
221 not used for intermittent preventive treatment for pregnant women (IPTp) as in other  
222 African countries. Nonetheless, SP resistance mutations persist at high prevalence. In  
223 DHFR, 98.9% ([95% CI 98.6-99.4%]) parasites had the S108N mutation, 98.5% ([95%

224 CI 97.8-99.3%]) N51I, and 65% ([95% CI 61.9-68.1%]) C59R (**Figure S5A**) mutations  
225 associated with pyrimethamine resistance. Overall, 469 (61.6%) samples carry all three  
226 mutations (DHFR IRN, triple mutant) with low spatial heterogeneity at regional level  
227 across the country. None of the genotyped samples carried DHFR 164L, a mutation  
228 associated with higher levels of SP resistance. Analysis of markers associated with  
229 sulfadoxine resistance revealed that all 907 (100%) isolates carried DHPS A437G and  
230 83.1% ([95% CI 80.6-85.4%]) K540E, with 711 (78.8%) carrying both of these mutations  
231 (DHPS GE, double mutant) (**Figure S5A**). The DHPS A581G mutation, shown to  
232 increase SP resistance, when co-occurring with the above mutations occurred at low  
233 frequency, 3.4% ([95% CI 2.6-5.4%]) (**Figure S5A**).

234

235 Chloroquine is widely used in Ethiopia for treatment of *Plasmodium vivax* infection.  
236 Mutations in the *P. falciparum* chloroquine (CQ) resistance transporter (CRT) were  
237 common; 896 (82.4%) parasites had the chloroquine-resistance marker 76T. All regions  
238 had high prevalence with the exception of Gambela in the southwest 7.6% ([95% CI  
239 5.2-8.4%]) (**Figure S5B**). Additional mutations in CRT are provided in **Table S3**.

240

#### 241 **Complexity of infection and parasite population structure**

242 The majority of sequenced samples were monogenomic 745 (87.1%) (**Figure S6A**),  
243 consistent with previous reports<sup>5,35</sup>, with some level variation in complexity of infection  
244 at the regional level (**Figure 4A**). The maximum COI detected was 4 (from Gambella  
245 Region) likely reflecting relatively low transmission in the study areas. Principal  
246 components (PC) 1 and 2 revealed distinct clustering of parasites from Gambella,  
247 supporting regional differentiation of the *P. falciparum* population within Ethiopia, but not  
248 by K13 622I status (**Figure 4B, Figure S7**).

249

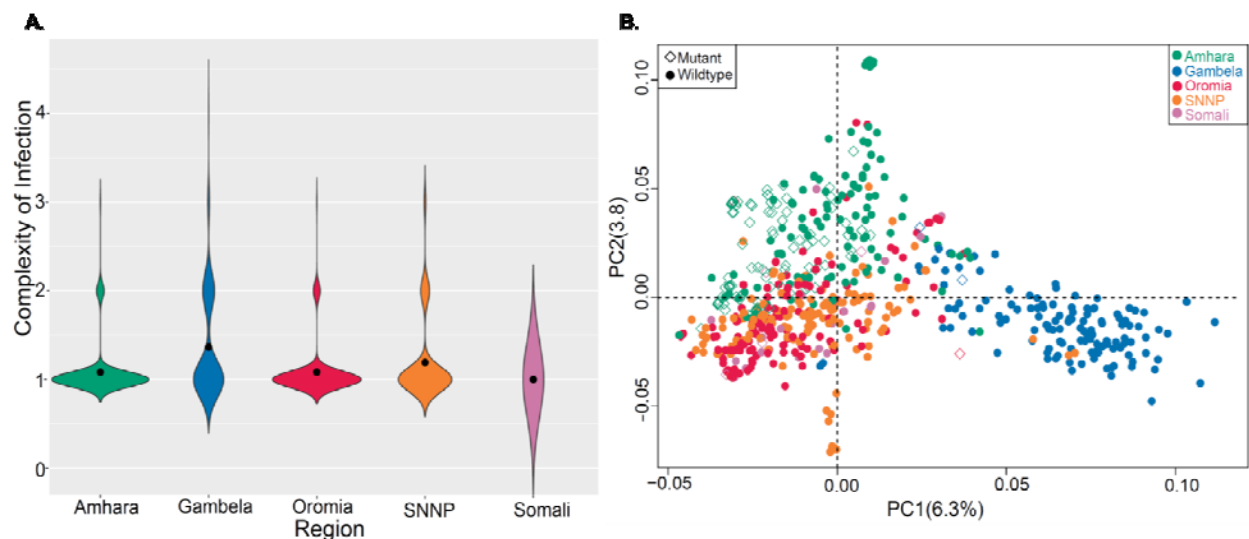

250

251 **Figure 4.** Complexity of infection and population structure of *P. falciparum* in Ethiopia.

252 **A)** Complexity of infections for *P. falciparum* at a regional level. Colors indicate regions



253 and black dots inside violin plots indicate median COI. **B)** PCA plot of *P. falciparum*  
254 population at regional level. Colors indicate geography of sample origins and shapes  
255 indicate mutation K13 R622I status. Each diamond or dot indicates individual parasites.  
256 Percentage of variance explained by each PCA presented in each plot.  
257

## 258 **Spatial patterns of parasite relatedness and connectivity**

259 We conducted IBD analysis of monogenomic infections to further elucidate the  
260 connectivity of the parasite population across different regions. Overall, we observed a  
261 tailed distribution of highly related parasite pairs (**Figure 5A**) with some level of spatial  
262 heterogeneity of proportion of pairs IBD for parasite population at each health center  
263 (**Figure 5B**). The lowest average IBD sharing observed at Abol health center, Gambella  
264 Region. We then conducted relatedness networks analysis to assess where haplotypes  
265 sharing IBD above the specified threshold cluster geographic region or sample origin  
266 and found clear clustering of highly related parasite pairs ( $IBD \geq 0.90$ ) within health  
267 centers suggesting inbreeding and clonal transmission at local scale (**Figure 5C**).  
268 However, occasional sharing of nearly clonal parasites was seen between clinics,  
269 suggesting long range parasite sharing. To identify if transmission of highly related  
270 parasite pairs ( $IBD \geq 0.90$ ) were occurring between clinics in a within a region and  
271 between different regions, we visualized a relatedness network on top of the Ethiopia  
272 map and found that majority of the highly related pairs were distributed within regions or  
273 nearby regions than distant regions. Connections between Gambella and other regions  
274 were rare (**Figure 5D**).

275

276

277

278

279

280

281

282

283

284

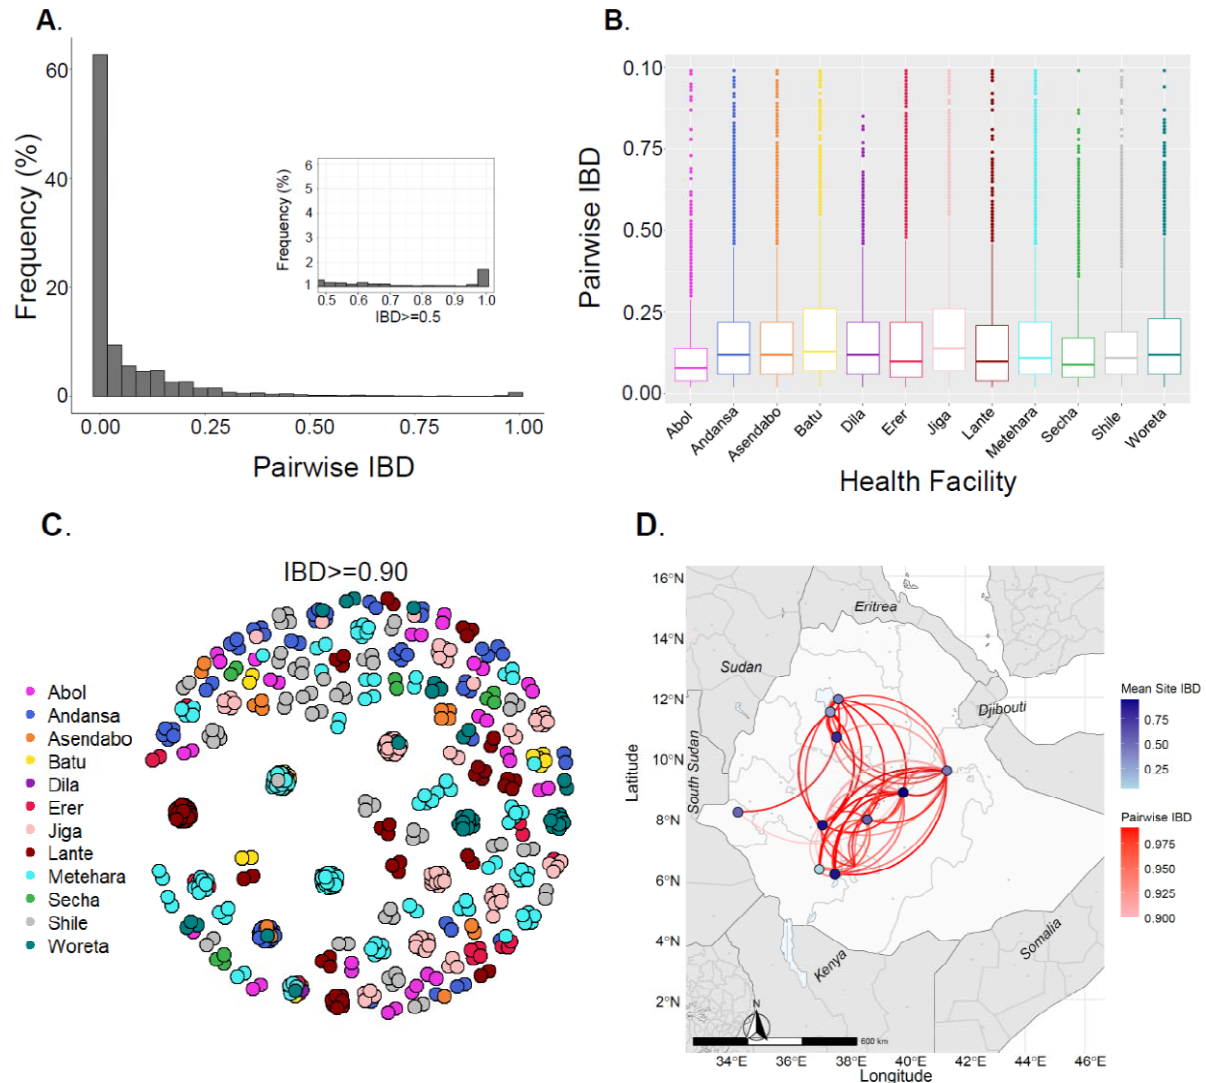

285

286

287 **Figure 5. *P. falciparum* parasite relatedness and connectivity across Ethiopia. A)**

288 Pairwise IBD sharing across 12 health facilities. The plot shows the probability that any

289 two isolates are identical by descent, where the x axis indicates IBD values and the y

290 axis indicates the frequency (%) of isolates sharing IBD. The inset highlights highly

291 related parasite pairs with a heavy tail in the distribution and some highly related pairs

292 of samples having  $IBD \geq 0.90$ . **B)** Pairwise IBD sharing within a health facility. Boxes

293 indicate the interquartile range, the line indicates the median, the whiskers show the

294 95% confidence intervals and dots show outlier values. **C)** Relatedness network of

295 highly related parasite pairs ( $IBD \geq 0.90$ ) at study site. Each dot indicates a sample and

296 colors correspond to health facilities across five regions in Ethiopia. Each node

297 identifies a unique isolate and an edge is drawn between two isolates if they share their

298 genome above  $IBD \geq 0.90$ . Isolates that do not share  $IBD \geq 0.90$  of their genomes with

299 any other isolates are not shown. **D)** Spatial distribution of highly related parasite pairs  
300 with  $IBD \geq 0.90$ . Color of circles or connecting lines represents the level of IBD sharing  
301 within and between sites, respectively. The within site shading is based upon the most  
302 related pair of parasites at the site.

### 303 **Discussion**

304 Findings from our genomic analysis of parasites collected across sentinel sites  
305 predominantly in 2022 suggest a critical threat of ArtR to ACT effectiveness in Ethiopia.  
306 We identified increased prevalence and evidence of spread of the previously identified  
307 WHO-validated ArtR K13 622I, with marked increases compared to previous reports.  
308 Here we see a prevalence of 622I up to 53.7% in Andansa Health Centre within the  
309 Amhara region, as compared to 10% in 2018<sup>5</sup> and 2.4% in 2014<sup>34</sup>. Parasites carrying  
310 622I are more closely related and clustered at health facility/district level compared to  
311 wildtype parasites.

312 These findings are consistent with our previous report of clonal transmission in three  
313 regions of Ethiopia<sup>5</sup>. The highly-related, clonal nature of K13 622I mutant parasites  
314 compared to wildtype parasites in this study is consistent with inbreeding and increasing  
315 frequency within populations, especially in low transmission areas<sup>36,37</sup>. Our findings  
316 highlight the value of establishing genomic surveillance at malaria sentinel sites,  
317 particularly how it can play a crucial role in tracking the emergence and spread of drug-  
318 resistant strains by providing continuous and localized monitoring of malaria parasite  
319 populations. It also provides deeper insight into the genetic population structure of  
320 parasites circulating at these sites. Researchers in collaboration with the malaria control  
321 program can detect early signals of resistance development, understand its  
322 geographical spread, and assess the effectiveness of current treatments<sup>38,39</sup>.

323 In addition to K13 622I, three WHO-validated K13 mutations (A675V from Gambella  
324 Region; P441L from South and Oromia Regions, and P574L from Oromia Region) are  
325 reported for the first time in Ethiopia. These K13 mutations are becoming more common  
326 in East Africa<sup>18,40-42</sup>. The K13 441L mutation found in three health centers from different  
327 geographic areas with variable malaria transmission and a recent increase in malaria  
328 cases. The validated K13 P574L mutation was present in 5 samples from only one site,  
329 Batu health center in the Oromia region. K13 P574L mutations have each been shown  
330 to have multiple independent origins throughout SE Asia<sup>43</sup> and have been reported in  
331 Africa<sup>44</sup>.

332 The K13 675V mutation was only found in one health center from Gambella Region of  
333 western Ethiopia neighboring South Sudan. This mutation was reported in isolates  
334 collected in Uganda beginning in 2016. It has proven to enhance parasite survival *in*

335 *vitro* and has been associated with resistance *in vitro*<sup>42,45</sup>. Importation of the 675V  
336 mutation seems probable given the IBD analysis showed lower relatedness and 4/6 of  
337 the participants with the mutation reported travel. However, we cannot confirm whether  
338 the haplotype carrying this mutation are imported or locally emerged due lack of publicly  
339 available WGS data with K13 675V mutations from East Africa. Potentially supporting  
340 the impact of travel and importation on parasites in Ethiopia, the parasite population  
341 from Gambella did not cluster with other parasite populations in the country. This  
342 differentiation could be for multiple reasons, such as different travel patterns in the  
343 country, potentially supported by the low number of long-distance connections with  
344 other clinics (**Figure 5D**). However, Gambella also shares a border with South Sudan  
345 and receives a large number of refugees from across the border. Recent studies of  
346 South Sudanese refugees entering and arriving at the Ugandan Adjumani refugee camp  
347 show 15.4% prevalence of 675V<sup>46</sup>. Combined, this suggests that 675V may be  
348 spreading rapidly across South Sudan thereby entering Ethiopia.

349 Different studies propose that high efficacy of partner drugs, high prevalence of  
350 polygenomic infections, and high parasite genetic diversity impede the spread of ACT  
351 resistance in Africa<sup>21,47,16</sup>. However, in this study we found a high prevalence of  
352 mutations associated with lumefantrine resistance<sup>48</sup>. The majority of genotyped samples  
353 carried the MDR1 NFD haplotype<sup>49,50</sup>, but three parasites with WHO-validated ArtR  
354 markers in our study carry MDR1 NFD haplotypes that could lead to ACT failure.  
355 Recent study showed that there is increasing prevalence of MDR1 NFD haplotypes in  
356 recent years in East Africa<sup>51</sup>. Moreover, the rollout of ACTs has led to an increase in the  
357 MDR1 NFD haplotypes across several African studies, suggesting parasite populations  
358 in Africa are under significant ACT selective pressure<sup>49</sup>. With reports of decreased ACT  
359 efficacy and treatment failure in Africa<sup>52-54</sup>, the presence of partner drug mutations and  
360 high prevalence of monogenomic infections suggests the conditions are ripe for ACT  
361 failure in Ethiopia. Thus, close monitoring of ACT efficacy and preparation for  
362 deployment of alternative treatment strategies (e.g. multiple sequential therapies,  
363 sequential ACT or triple ACT) are needed.

364 This study does have limitations. First it does not address whether the mutations are  
365 directly emerging locally or are imported. This will be possible as more genomic  
366 information is produced from other areas of Africa and whole genome sequencing of  
367 these isolates is done allowing for accurate tracking of K13 haplotypes. Second, it did  
368 not address the impact of these mutations on clinical resistance as the *in vitro* efficacy  
369 was not evaluated. Third, 12 sentinel sites do not represent the entirety of malaria  
370 epidemiology or parasite populations circulating in Ethiopia. Nonetheless, sampling  
371 across most regions of the country provides valuable, generalizable information for the  
372 malaria control program. Despite these limitations, these data provide important findings  
373 about how ArtR is spreading in the Horn of Africa which is critical information for malaria

374 control programs. Lastly, our data suggests importation and population movement may  
375 play a role in the genetic patterns seen, but we do not have details on locations and  
376 duration of travel to test this.

377 In conclusion, this study highlights critical challenges for malaria control including: 1) the  
378 continued emergence and spread of the validated 622I mutation, 2) the detection of new  
379 validated ArtR mutations in the Horn of Africa, and 3) the high rate of the co-occurrence  
380 of ArtR with the MDR1 NFD haplotype associated with reduced sensitivity to  
381 lumefantrine, the key partner drug in the region. It also raises additional questions about  
382 the impact of importation and travel on the spread of antimalarial resistance, questions  
383 that will be answered as more genomic data from Africa becomes available. We also  
384 demonstrate that sentinel surveillance systems can leverage genomics to provide  
385 critical information to control programs and potentially can help target where *in vivo*  
386 studies should be focused to determine the clinical impacts of antimalarial resistance  
387 polymorphisms, as was done for validated ArtR in Tanzania due to the 561H  
388 mutation<sup>11,41</sup>. All of East Africa and the Horn of Africa are going to face significant  
389 challenges in the years to come due to emerging antimalarial resistance, and malaria  
390 molecular surveillance will play a key role in fighting this emerging threat<sup>4,6,55</sup>.

391

## 392 **Methods**

### 393 **Study sites and sample collection**

394 EPHI maintains 25 malaria sentinel sites, representing the variable eco-epidemiological  
395 zones across the country. A series of cross-sectional studies were conducted in 12 of  
396 these sites between 2019 and 2022 to assess the emergence and prevalence of  
397 antimalarial drug resistance markers. The study sentinel sites included at least one area  
398 where large scale industry and irrigation, typically for sugar, is occurring and one  
399 location in a border area (**Figure 1A**). From September to November of each year,  
400 patients attending the outpatient department with signs and symptoms of malaria were  
401 screened by microscopy. Microscopy occurred in the field and was reviewed by a  
402 second expert microscopist at EPHI. In cases of discordance, a third reader was used,  
403 blinded to previous reads. Inclusion criteria included *P. falciparum* positive by  
404 microscopy. Patients less than 1 year or with severe malaria were excluded. Following  
405 consent, a brief questionnaire was performed (including patient age, sex, malaria sign  
406 and symptoms, travel history and demography), and dried blood spot (DBS) samples  
407 were blotted onto Whatman 3 filter paper, air-dried, placed individually in a plastic bag  
408 containing silica gel desiccant. These were stored at room temperature prior to transport  
409 to EPHI, and stored at -20 °C until used.



410

## 411 **DNA extraction and MIP sequencing**

412

413 DNA was extracted from DBS (one full DBS spot, typically involving 2 or 3 6mm  
414 punches) using Chelex-Tween as previously described<sup>56</sup>.

415

416 Five microliters of extracted DNA were used for each of the MIP captures using two  
417 panels: one covering key *P. falciparum* drug resistance genes and mutations, including  
418 *k13*, *mdr1*, *crt*, *dhfr*, and *dhps* genes, and a newly designed panel of 305 MIPs targeting  
419 common SNPs (>5%) SNPs (**Table S4**) (Niare *et al.* in preparation). MIP capture and  
420 library preparation were performed as previously described<sup>5,57</sup>. Sequencing was  
421 conducted using an Illumina NextSeq 550 instrument (150 bp paired-end reads) at  
422 Brown University (RI, USA). For samples with newly detected K13 441L, 574L and  
423 675V, mutations in Ethiopia, an additional MIP capture was done using the same MIP  
424 panel and resequenced to a high depth to confirm the mutations. Controls for each MIP  
425 capture and sequencing included genomic DNA from serial dilution of lab strain 3D7 as  
426 well as no template and no probe controls.

427

## 428 **Variant calling and filtering**

429 The sequencing reads generated for each MIP panel were demultiplexed separately  
430 using MIPtools software (<https://github.com/bailey-lab/MIPTools>) and further processed  
431 using MIP Wrangler software (<https://github.com/bailey-lab/MIPWrangler>), in which  
432 sequence reads sharing the same Unique Molecular Identifiers (UMIs) were collapsed  
433 to generate a single consensus. Each dataset was analyzed by mapping sequence  
434 reads to the *P. falciparum* 3D7 reference genome using Burrows-Wheeler Aligner  
435 (BWA)<sup>58</sup>. Then variant calling was performed using freebayes software<sup>59</sup>. To reduce  
436 false positives due to PCR and alignment errors, the alternative allele needed to be  
437 supported by more than one UMI within a sample, and the allele must have been  
438 represented by at least 10 UMIs across the entire population. For genome wide SNPs,  
439 only biallelic variant SNP positions were retained for downstream analysis. Low quality  
440 SNPs (mapping quality < 30), were removed from the analysis using vcftools<sup>60</sup>;  
441 additionally, individual variant calls within each sample were set to missing if the site  
442 was not supported by at least five UMIs. After these steps, SNPs with more than 50%  
443 missing data across samples, and subsequently samples with more than 50% of SNPs  
444 missing, were removed from all downstream analyses<sup>5</sup>.



## 445 **Drug resistance prevalence estimation**

446 For drug resistance analysis, variants were annotated using the *Pf 3D7* v3 reference  
447 genome and gene features. Variants with a unique UMI count of 3 or greater used to  
448 estimate prevalence key and known drug resistance mutations associated with different  
449 antimalarial resistance using the *miplicorn* package R 4.2.1 software  
450 (<https://github.com/bailey-lab/miplicorn>) and custom R script. With the exception of the  
451 DHPS 437 mutation (which is mutant in the reference genome), drug resistance  
452 prevalence was determined considering both heterozygous or homozygous variants as  
453 mutant alleles, while homozygous reference alleles considered as wild-type, and  
454 missing loci not included for prevalence calculation ( $p=x/n*100$ ), where  $p$  = prevalence,  
455  $x$  = number of mutant alleles,  $n$  = number of successfully genotyped loci.  $n$  is different  
456 for each locus as each locus had independent success rates for genotyping. Prevalence  
457 and frequency bar plots were generated using the *ggplot2* package and spatial  
458 visualization of prevalence on maps of study areas were created using the *sf* package in  
459 R 4.2.1 software. Analysis of haplotypes included only samples where complete  
460 genotypes across all involved variant sites were available and was plotted and  
461 visualized using the *UpSet* package in R 4.2.1 software. Finally, the prevalence of each  
462 drug resistance marker was calculated at the health facility level.

## 463 **Analysis of complexity of infectious and parasite population structure**

464 The complexity of infection (COI) is the number of distinct parasite clones infecting a  
465 single host. To estimate the number of clones per sample, the VCF file containing SNP  
466 data was converted to THE REAL McCOIL categorical method format: heterozygous  
467 call as 0.5, homozygous reference allele as 0, homozygous alternative allele as 1 and  
468 no call as -1 and used as an input file for analysis of COI using THE REAL McCOIL R  
469 package. To assess whether parasite populations within Ethiopia clustered per their  
470 geographic origin, or by mutation status, we conducted principal component analysis  
471 (PCA) using *SNPRelate* function in R 4.2.1 software and the result was visualized  
472 *ggplot2*.

## 473 **Analysis of parasite relatedness using Identity-by-descent (IBD)**

474 We used identity-by-descent (IBD) to measure relatedness between parasites and  
475 identify regions of the genome shared with recent common ancestry using the  
476 *inbreeding\_mle* function in MIPAnalyser software (v.1.0.1) (<https://github.com/mrc-ide/MIPAnalyser>)  
477 in R 4.2.1 software as previously described<sup>61</sup>. In brief, both  
478 monogenomic and polygenomic infections (major alleles used for heterozygous  
479 positions) were included in the IBD analysis. *Inbreeding\_mle* uses a Markov chain  
480 Monte Carlo to detect genomic regions that are identical by descent (IBD) and aids

481 simultaneous detection of parasite population clustering. Networks of highly-related  
482 parasites per k13 mutation status or geographic origin (health facilities) created using  
483 the *igraph* package in R 4.2.1 software. We then assessed IBD sharing at the regional  
484 and local (health facility level) scales in order to assess spatial distribution of the  
485 parasite population.

#### 486 487 **Data availability**

488 All data produced in the present study are available upon reasonable request to the  
489 authors.

490  
491 **Funding:** This work was funded by the World Bank through the Africa CDC, with partial  
492 support from the National Institute for Allergy and Infectious Diseases (R01AI177791 to  
493 JBP, K24AI134990 to JJJ, and R01AI139520 to JAB).

#### 494 495 **Ethics**

496 Before the commencement of the study, scientific and ethical approval was obtained  
497 from the Ethiopian Public Health Institute's Institutional Review Board (EPHI-IRB),  
498 protocol number EPHI-IRB-398-2021. In addition, respective permission and supporting  
499 letters were obtained from the health facilities administration. All the necessary  
500 precautionary and ethical methods were considered during the implementation of the  
501 study for the patients and investigators. All screening forms and case record forms are  
502 kept in a secured location, with access limited to authorized staff members. Unique  
503 numerical identifiers were used for the computer-based data entry and blood samples.  
504 Genotyping work conducted at Brown University was considered non-human subjects  
505 research. Only aggregated clinical data and de-identified samples used for reporting  
506 individual level genotypes for publication.

#### 507 **Author contributions**

508 BGB, AA, AAF, JBP, JJJ and JAB conceived the study. BGB led patient recruitment and  
509 sample collection with contributions from HN, MK, HH, YW, GT, AA, MH, HS, AG, GA,  
510 HS, GT and AA. BGB, AL and AAF performed laboratory work. BGB and AAF led  
511 genetic data analysis and wrote the first draft of the manuscript. AA, JBP, JJJ and JAB  
512 supported genetic data analysis and interpretations of results. All authors contributed to  
513 the writing of the manuscript and approved the final version before submission.

#### 514 **Acknowledgments**

515 The authors used an artificial intelligence language model for English language editing  
516 during the writing process. However, the manuscript is original to the authors, who take  
517 responsibility for its content.

518

519

520 **Competing interests:** JBP reports research support from Gilead Sciences, non-  
521 financial support from Abbott Laboratories, and consulting for Zymeron Corporation, all  
522 outside the scope of the current manuscript.

## 523 References

- 524 1. World Health Organization. *World Malaria Report 2023*. (World Health  
525 Organization, 2023).
- 526 2. Bhatt, S. *et al.* The effect of malaria control on *Plasmodium falciparum* in Africa  
527 between 2000 and 2015. *Nature* **526**, 207–211 (2015).
- 528 3. Beeson, J. G. *et al.* The RTS,S malaria vaccine: Current impact and foundation for  
529 the future. *Sci. Transl. Med.* **14**, eabo6646 (2022).
- 530 4. Rosenthal, P. J. *et al.* The emergence of artemisinin partial resistance in Africa:  
531 how do we respond? *Lancet Infect. Dis.* (2024) doi:10.1016/S1473-3099(24)00141-  
532 5.
- 533 5. Fola, A. A. *et al.* *Plasmodium falciparum* resistant to artemisinin and diagnostics  
534 have emerged in Ethiopia. *Nat Microbiol* **8**, 1911–1919 (2023).
- 535 6. Ishengoma, D. S. *et al.* Urgent action is needed to confront artemisinin partial  
536 resistance in African malaria parasites. *Nat. Med.* (2024) doi:10.1038/d41591-024-  
537 00028-y.
- 538 7. Feleke, S. M. *et al.* *Plasmodium falciparum* is evolving to escape malaria rapid  
539 diagnostic tests in Ethiopia. *Nat Microbiol* **6**, 1289–1299 (2021).
- 540 8. Zinszer, K. & Talisuna, A. O. Fighting insecticide resistance in malaria control.  
541 *Lancet Infect. Dis.* **23**, 138–139 (2023).
- 542 9. Emiru, T. *et al.* Evidence for a role of *Anopheles stephensi* in the spread of drug-  
543 and diagnosis-resistant malaria in Africa. *Nat. Med.* **29**, 3203–3211 (2023).
- 544 10. Nkumama, I. N., O'Meara, W. P. & Osier, F. H. A. Changes in Malaria  
545 Epidemiology in Africa and New Challenges for Elimination. *Trends Parasitol.* **33**,  
546 128–140 (2017).
- 547 11. Ishengoma, D. S. *et al.* Evidence of artemisinin partial resistance in northwestern  
548 Tanzania: clinical and molecular markers of resistance. *Lancet Infect. Dis.* (2024)  
549 doi:10.1016/S1473-3099(24)00362-1.
- 550 12. Tumwebaze, P. *et al.* Changing Antimalarial Drug Resistance Patterns Identified by  
551 Surveillance at Three Sites in Uganda. *J. Infect. Dis.* **215**, 631–635 (2017).
- 552 13. Dondorp, A. M. *et al.* Artemisinin resistance in *Plasmodium falciparum* malaria. *N.*  
553 *Engl. J. Med.* **361**, 455–467 (2009).
- 554 14. Noedl Harald *et al.* Evidence of Artemisinin-Resistant Malaria in Western  
555 Cambodia. *N. Engl. J. Med.* **359**, 2619–2620.
- 556 15. Tun, K. M. *et al.* Spread of artemisinin-resistant *Plasmodium falciparum* in  
557 Myanmar: a cross-sectional survey of the K13 molecular marker. *Lancet Infect. Dis.*  
558 **15**, 415–421 (2015).
- 559 16. Ashley Elizabeth A. *et al.* Spread of Artemisinin Resistance in *Plasmodium*  
560 *falciparum* Malaria. *N. Engl. J. Med.* **371**, 411–423.

- 561 17. Uwimana, A. *et al.* Author Correction: Emergence and clonal expansion of in vitro  
562 artemisinin-resistant *Plasmodium falciparum* kelch13 R561H mutant parasites in  
563 Rwanda. *Nat. Med.* **27**, 1113–1115 (2021).
- 564 18. Young, N. W. *et al.* High frequency of artemisinin partial resistance mutations in the  
565 great lake region revealed through rapid pooled deep sequencing. *medRxiv* (2024)  
566 doi:10.1101/2024.04.29.24306442.
- 567 19. Juliano, J. J. *et al.* Prevalence of mutations associated with artemisinin partial  
568 resistance and sulfadoxine-pyrimethamine resistance in 13 regions in Tanzania in  
569 2021: a cross-sectional survey. *Lancet Microbe* 100920 (2024).
- 570 20. Mihreteab, S. *et al.* Increasing Prevalence of Artemisinin-Resistant HRP2-Negative  
571 Malaria in Eritrea. *N. Engl. J. Med.* **389**, 1191–1202 (2023).
- 572 21. Balikagala, B. *et al.* Evidence of Artemisinin-Resistant Malaria in Africa. *N. Engl. J.*  
573 *Med.* **385**, 1163–1171 (2021).
- 574 22. van Loon, W. *et al.* Detection of Artemisinin Resistance Marker Kelch-13 469Y in  
575 *Plasmodium falciparum*, South Kivu, Democratic Republic of the Congo, 2022. *Am.*  
576 *J. Trop. Med. Hyg.* **110**, 653–655 (2024).
- 577 23. Dhorda, M. *et al.* Artemisinin-resistant malaria in Africa demands urgent action.  
578 *Science* **385**, 252–254 (2024).
- 579 24. Rosado, J. *et al.* *Ex vivo* susceptibility to antimalarial drugs and polymorphisms in  
580 drug resistance genes of African *Plasmodium falciparum*, 2016-2023: a genotype-  
581 phenotype association study. *bioRxiv* (2024) doi:10.1101/2024.07.17.24310448.
- 582 25. Hamlet, A. *et al.* The potential impact of *Anopheles stephensi* establishment on the  
583 transmission of *Plasmodium falciparum* in Ethiopia and prospective control  
584 measures. *BMC Med.* **20**, 135 (2022).
- 585 26. Messenger, L. A. *et al.* Insecticide resistance in *Anopheles arabiensis* from Ethiopia  
586 (2012-2016): a nationwide study for insecticide resistance monitoring. *Malar. J.* **16**,  
587 469 (2017).
- 588 27. Nigussie, T. Z., Zewotir, T. & Muluneh, E. K. Effects of climate variability and  
589 environmental factors on the spatiotemporal distribution of malaria incidence in the  
590 Amhara national regional state, Ethiopia. *Spat. Spatiotemporal Epidemiol.* **40**,  
591 100475 (2022).
- 592 28. Tandoh, K. Z., Duah-Quashie, N. O., Raman, J. & Ochola-Oyier, L. I. Editorial:  
593 Malaria molecular epidemiology current situation in Africa. *Front Epidemiol* **4**,  
594 1400612 (2024).
- 595 29. Inzaule, S. C., Tessema, S. K., Kebede, Y., Ogwel Ouma, A. E. & Nkengasong, J.  
596 N. Genomic-informed pathogen surveillance in Africa: opportunities and challenges.  
597 *Lancet Infect. Dis.* **21**, e281–e289 (2021).
- 598 30. Schaffner, S. F. *et al.* Malaria surveillance reveals parasite relatedness, signatures  
599 of selection, and correlates of transmission across Senegal. *Nat. Commun.* **14**,  
600 7268 (2023).
- 601 31. Fola, A. A. *et al.* Genomics reveals heterogeneous *Plasmodium falciparum*  
602 transmission and selection signals in Zambia. *Commun. Med.* **4**, 67 (2024).
- 603 32. Struelens, M. J. *et al.* Real-time genomic surveillance for enhanced control of  
604 infectious diseases and antimicrobial resistance. *Front. Sci. Ser.* **2**, (2024).
- 605 33. Golumbeanu, M., Edi, C. A. V., Hetzel, M. W., Koepfli, C. & Nsanzabana, C.  
606 Bridging the Gap from Molecular Surveillance to Programmatic Decisions for



- 607 Malaria Control and Elimination. *Am. J. Trop. Med. Hyg.* (2023)  
608 doi:10.4269/ajtmh.22-0749.
- 609 34. Bayih, A. G. *et al.* A Unique *Plasmodium falciparum* K13 Gene Mutation in  
610 Northwest Ethiopia. *Am. J. Trop. Med. Hyg.* **94**, 132–135 (2016).
- 611 35. Abera, D. *et al.* Genomic analysis reveals independent evolution of *Plasmodium*  
612 *falciparum* populations in Ethiopia. *Malar. J.* **20**, 129 (2021).
- 613 36. Anderson, T. J. *et al.* Microsatellite markers reveal a spectrum of population  
614 structures in the malaria parasite *Plasmodium falciparum*. *Mol. Biol. Evol.* **17**,  
615 1467–1482 (2000).
- 616 37. Camponovo, F., Buckee, C. O. & Taylor, A. R. Measurably recombining malaria  
617 parasites. *Trends Parasitol.* **39**, 17–25 (2023).
- 618 38. Neafsey, D. E. & Volkman, S. K. Malaria Genomics in the Era of Eradication. *Cold*  
619 *Spring Harb. Perspect. Med.* **7**, (2017).
- 620 39. Auburn, S. & Barry, A. E. Dissecting malaria biology and epidemiology using  
621 population genetics and genomics. *Int. J. Parasitol.* **47**, 77–85 (2017).
- 622 40. Meier-Scherling, C. P. G. *et al.* Selection of artemisinin partial resistance Kelch13  
623 mutations in Uganda in 2016-22 was at a rate comparable to that seen previously  
624 in South-East Asia. *medRxiv* (2024) doi:10.1101/2024.02.03.24302209.
- 625 41. Juliano, J. J. *et al.* Country wide surveillance reveals prevalent artemisinin partial  
626 resistance mutations with evidence for multiple origins and expansion of high level  
627 sulfadoxine-pyrimethamine resistance mutations in northwest Tanzania. *medRxiv*  
628 (2023) doi:10.1101/2023.11.07.23298207.
- 629 42. Conrad, M. D. *et al.* Evolution of Partial Resistance to Artemisinins in Malaria  
630 Parasites in Uganda. *N. Engl. J. Med.* **389**, 722–732 (2023).
- 631 43. Stokes, B. H. *et al.* *Plasmodium falciparum* K13 mutations in Africa and Asia impact  
632 artemisinin resistance and parasite fitness. *Elife* **10**, (2021).
- 633 44. Uwimana, A. *et al.* Emergence and clonal expansion of in vitro artemisinin-resistant  
634 *Plasmodium falciparum* kelch13 R561H mutant parasites in Rwanda. *Nat. Med.* **26**,  
635 1602–1608 (2020).
- 636 45. Ikeda, M. *et al.* Artemisinin-Resistant *Plasmodium falciparum* with High Survival  
637 Rates, Uganda, 2014-2016. *Emerg. Infect. Dis.* **24**, 718–726 (2018).
- 638 46. Tukwasibwe, S. *et al.* Varied Prevalence of Antimalarial Drug Resistance Markers  
639 in Different Populations of Newly Arrived Refugees in Uganda. *J. Infect. Dis.* **230**,  
640 497–504 (2024).
- 641 47. Talisuna, A. O. *et al.* Mitigating the threat of artemisinin resistance in Africa:  
642 improvement of drug-resistance surveillance and response systems. *Lancet Infect.*  
643 *Dis.* **12**, 888–896 (2012).
- 644 48. Grais, R. F. *et al.* Molecular markers of resistance to amodiaquine plus  
645 sulfadoxine–pyrimethamine in an area with seasonal malaria chemoprevention in  
646 south central Niger. *Malar. J.* **17**, 1–9 (2018).
- 647 49. Okell, L. C. *et al.* Emerging implications of policies on malaria treatment: genetic  
648 changes in the Pfmdr-1 gene affecting susceptibility to artemether-lumefantrine and  
649 artesunate-amodiaquine in Africa. *BMJ Glob Health* **3**, e000999 (2018).
- 650 50. Veiga, M. I. *et al.* Globally prevalent PfMDR1 mutations modulate *Plasmodium*  
651 *falciparum* susceptibility to artemisinin-based combination therapies. *Nat. Commun.*  
652 **7**, 11553 (2016).

- 653 51. Fola, A. A. *et al.* Temporal genomic analysis of *Plasmodium falciparum* reveals  
654 increased prevalence of mutations associated with delayed clearance following  
655 treatment with artemisinin-lumefantrine in Choma District, Southern Province,  
656 Zambia. *medRxiv* (2024) doi:10.1101/2024.06.05.24308497.
- 657 52. Eklund, E. H. & Fidock, D. A. Advances in understanding the genetic basis of  
658 antimalarial drug resistance. *Curr. Opin. Microbiol.* **10**, 363–370 (2007).
- 659 53. Guyant, P. *et al.* Past and new challenges for malaria control and elimination: the  
660 role of operational research for innovation in designing interventions. *Malar. J.* **14**,  
661 279 (2015).
- 662 54. Arya, A., Kojom Foko, L. P., Chaudhry, S., Sharma, A. & Singh, V. Artemisinin-  
663 based combination therapy (ACT) and drug resistance molecular markers: A  
664 systematic review of clinical studies from two malaria endemic regions – India and  
665 sub-Saharan Africa. *International Journal for Parasitology: Drugs and Drug*  
666 *Resistance* vol. 15 43–56 Preprint at <https://doi.org/10.1016/j.ijpddr.2020.11.006>  
667 (2021).
- 668 55. Assefa, A., Fola, A. A. & Tasew, G. Emergence of *Plasmodium falciparum* strains  
669 with artemisinin partial resistance in East Africa and the Horn of Africa: is there a  
670 need to panic? *Malar. J.* **23**, 34 (2024).
- 671 56. Teyssier, N. B. *et al.* Optimization of whole-genome sequencing of *Plasmodium*  
672 *falciparum* from low-density dried blood spot samples. *Malar. J.* **20**, 116 (2021).
- 673 57. Verity, R. *et al.* The impact of antimalarial resistance on the genetic structure of  
674 *Plasmodium falciparum* in the DRC. *Nat. Commun.* **11**, 2107 (2020).
- 675 58. Li, H. Aligning sequence reads, clone sequences and assembly con\*gs with BWA-  
676 MEM. (2014) doi:10.6084/M9.FIGSHARE.963153.V1.
- 677 59. Garrison, E. & Marth, G. Haplotype-based variant detection from short-read  
678 sequencing. *arXiv [q-bio.GN]* (2012).
- 679 60. Danecek, P. *et al.* The variant call format and VCFtools. *Bioinformatics* **27**, 2156–  
680 2158 (2011).
- 681 61. Verity, R. *et al.* The impact of antimalarial resistance on the genetic structure of  
682 *Plasmodium falciparum* in the DRC. *Nat. Commun.* **11**, 2107 (2020).

683

684

685

686

687

688

689

690

691



692

693

694

695 **Supplementary materials**

696

697 Supplementary Figures

698

699

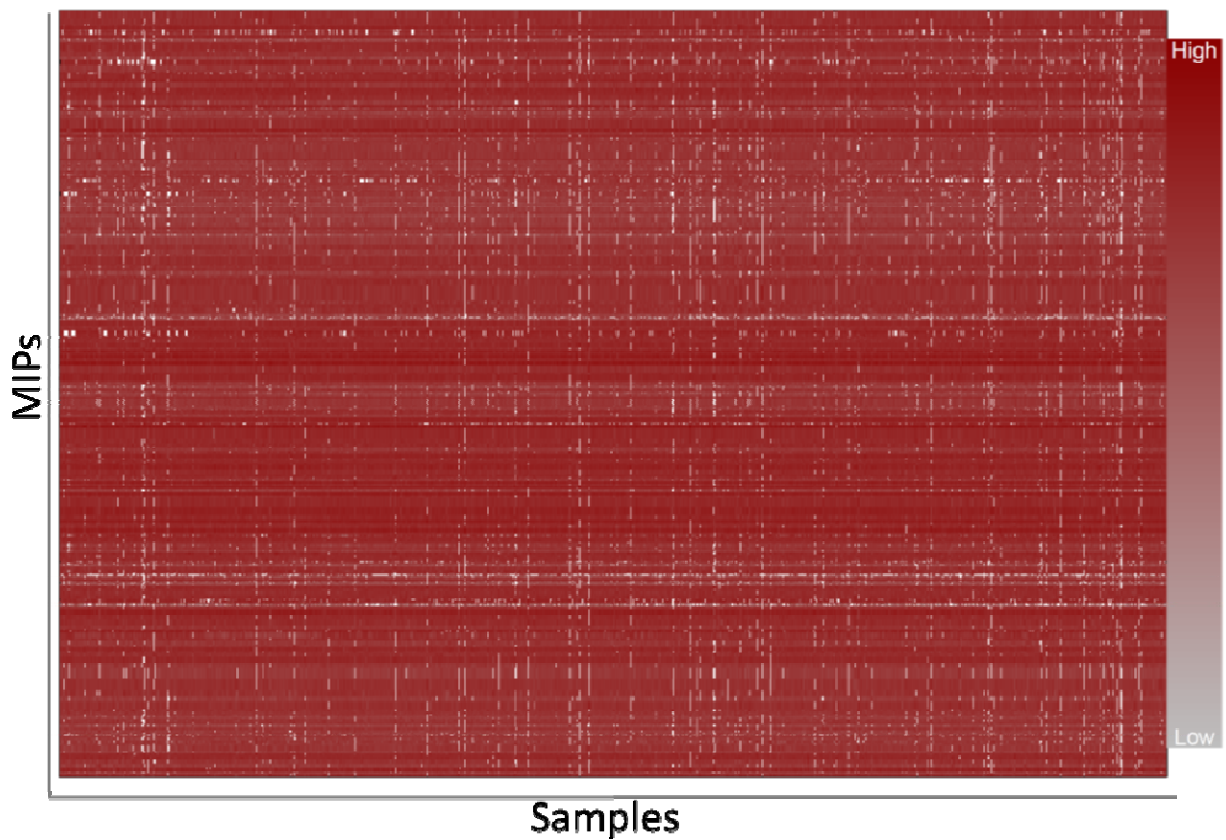

700

701

702 **Figure S1. MIP sequencing coverage for genome-wide SNPs.** Heatmap color shows  
703 samples ( $n = 855$ , columns) and loci ( $n = 1415$ , rows) coverage retained after  
704 filtering for downstream analysis.

705

706

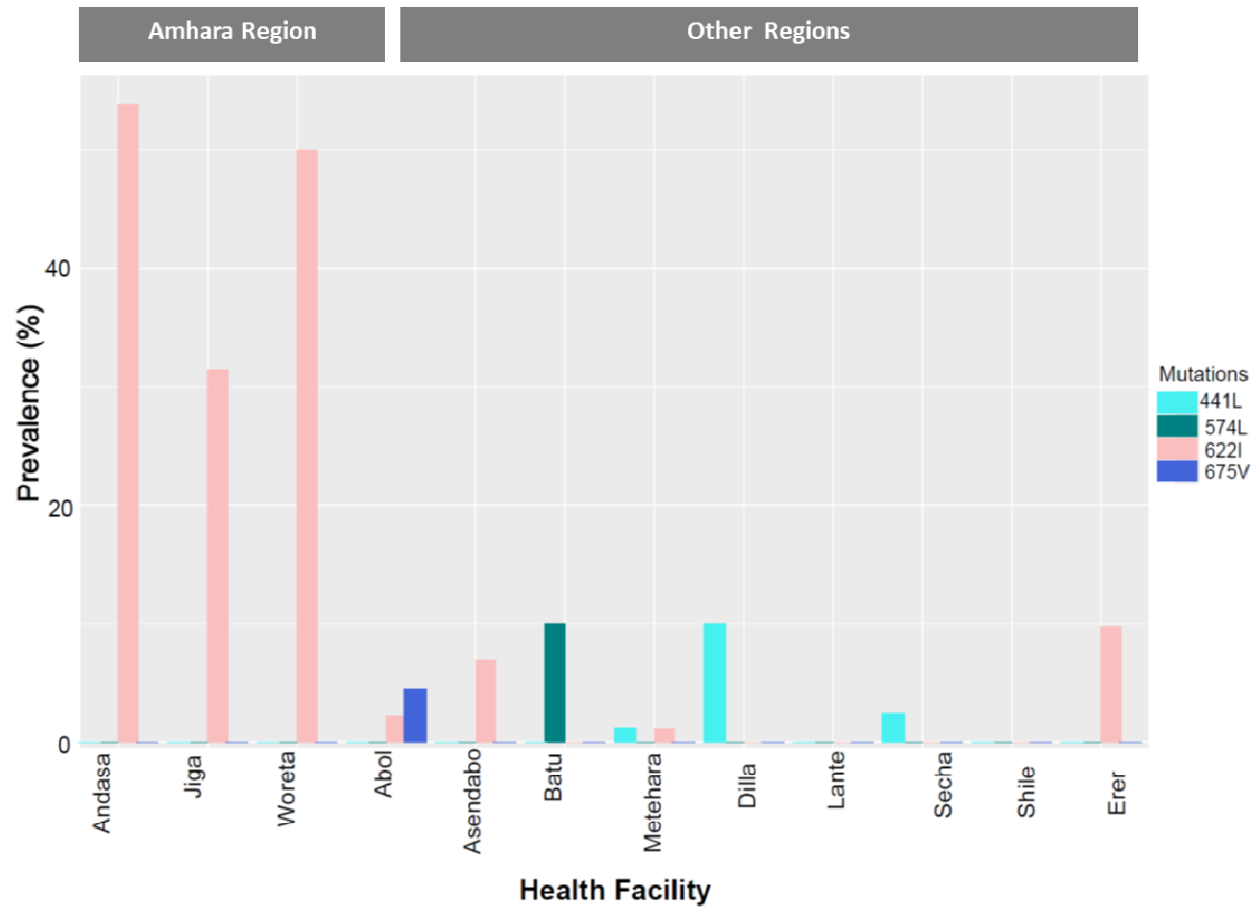

707

708 **Figure S2. WHO validated K13 mutations prevalence at health facility level. Bar**

709 **plots show** prevalence of the indicated mutations at health facility level per region.

710 Colours indicate mutations

711

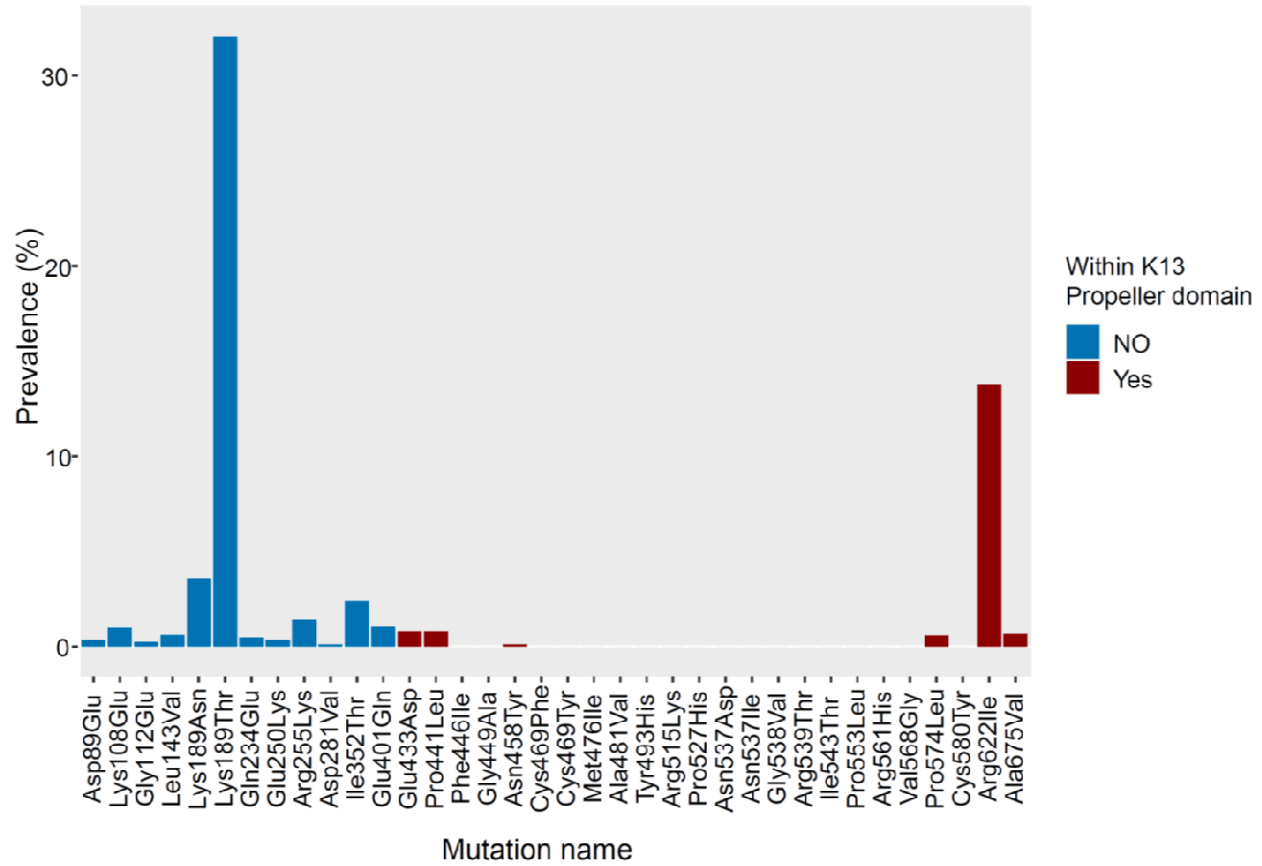

712  
713  
714  
715  
716  
717  
718  
719  
720  
721  
722  
723  
724  
725  
726  
727  
728  
729  
730  
731

**Figure S3.** Prevalence of non-synonymous mutations across the *K13* gene, coloured according to amino-acid residues within beta propeller domain where validated resistance mutations are located or not.

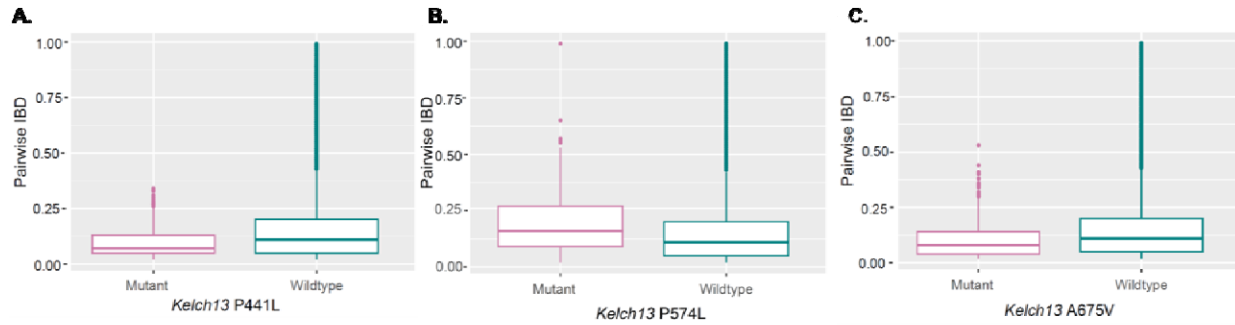

732  
733  
734  
735  
736  
737  
738  
739

**Figure S4. Comparison of relatedness of mutant vs wildtype.** **A)** Plot shows the mean IBD within K13 P441L mutant versus wildtype parasites. **B)** Plot shows the mean IBD within K13 P574L mutant versus wild type parasites. **C)** Plot shows the mean IBD within K13 A675V mutant versus wild type parasites. Color codes correspond to *kelch13* R622I mutant and wild parasites.

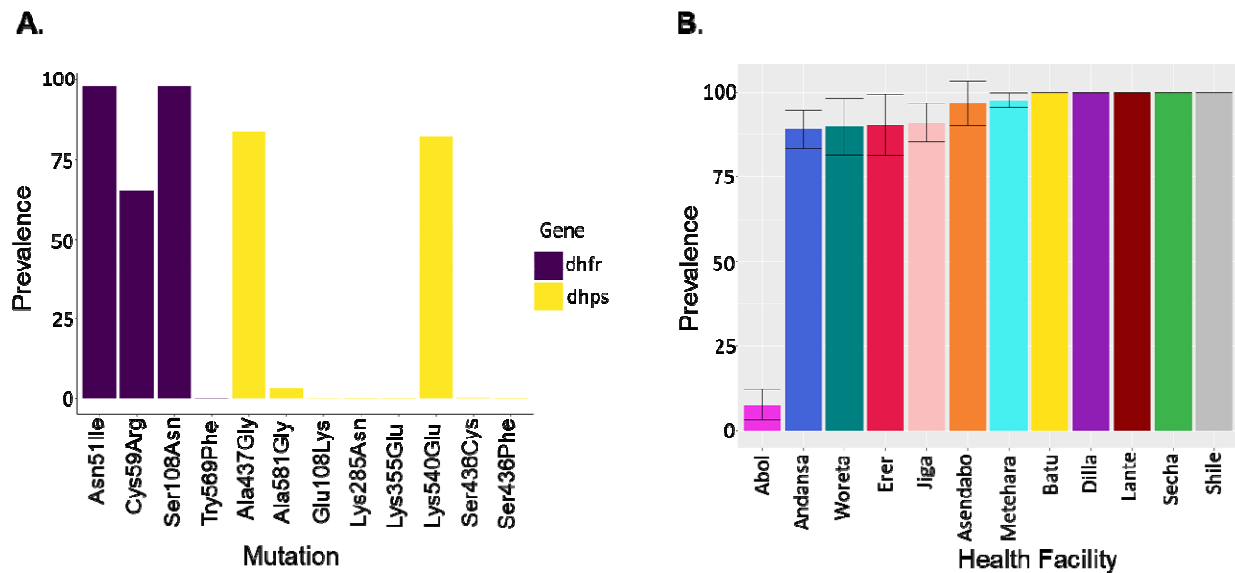

740  
741  
742  
743  
744  
745  
746  
747  
748

**Fig S5. Prevalence of SP (A) and CRT K76T (B) mutations in Ethiopia.** **A)** commutative prevalence of different SP markers. Bars indicate individual mutation and colors indicate gene. **B)** Prevalence of CRT K76T prevalence at health facility level.

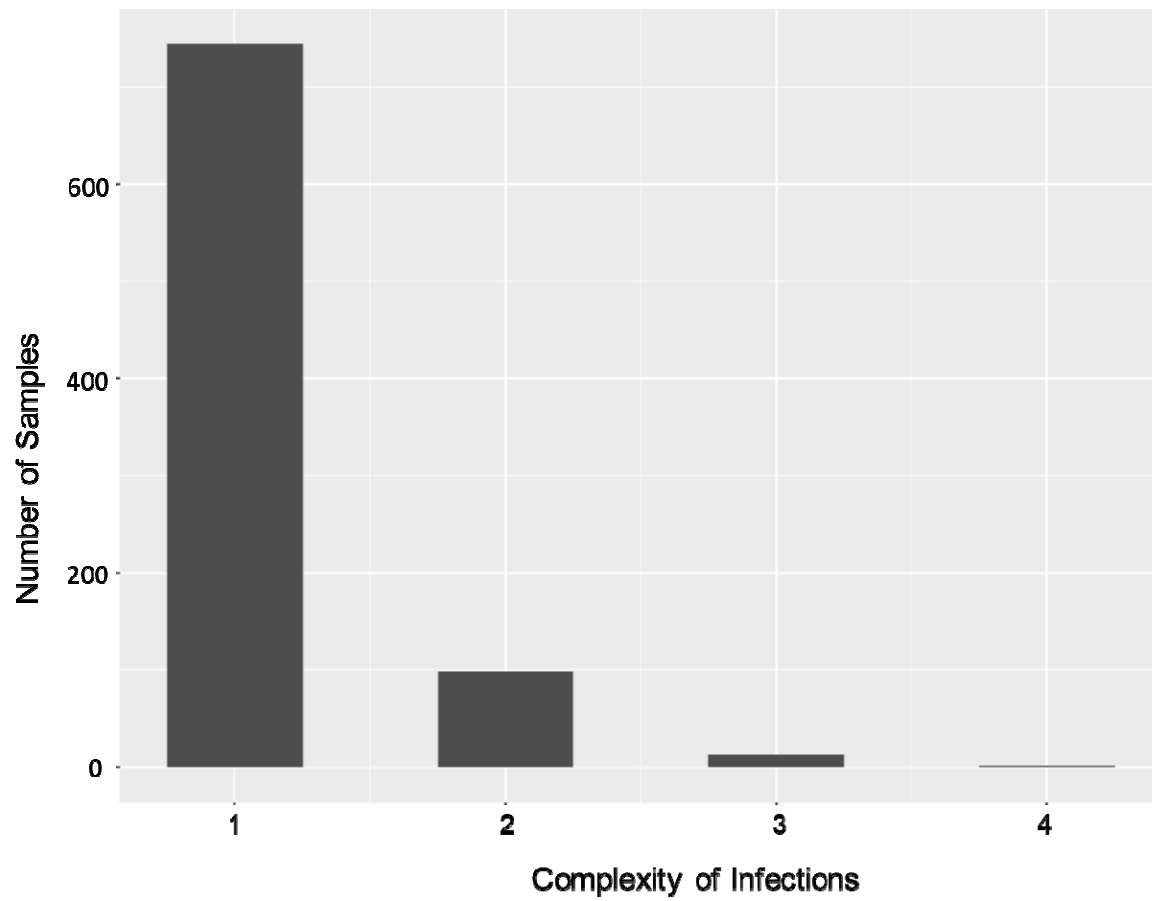

749  
750  
751

**Figure S6. Complexity of infections across sequenced samples.**

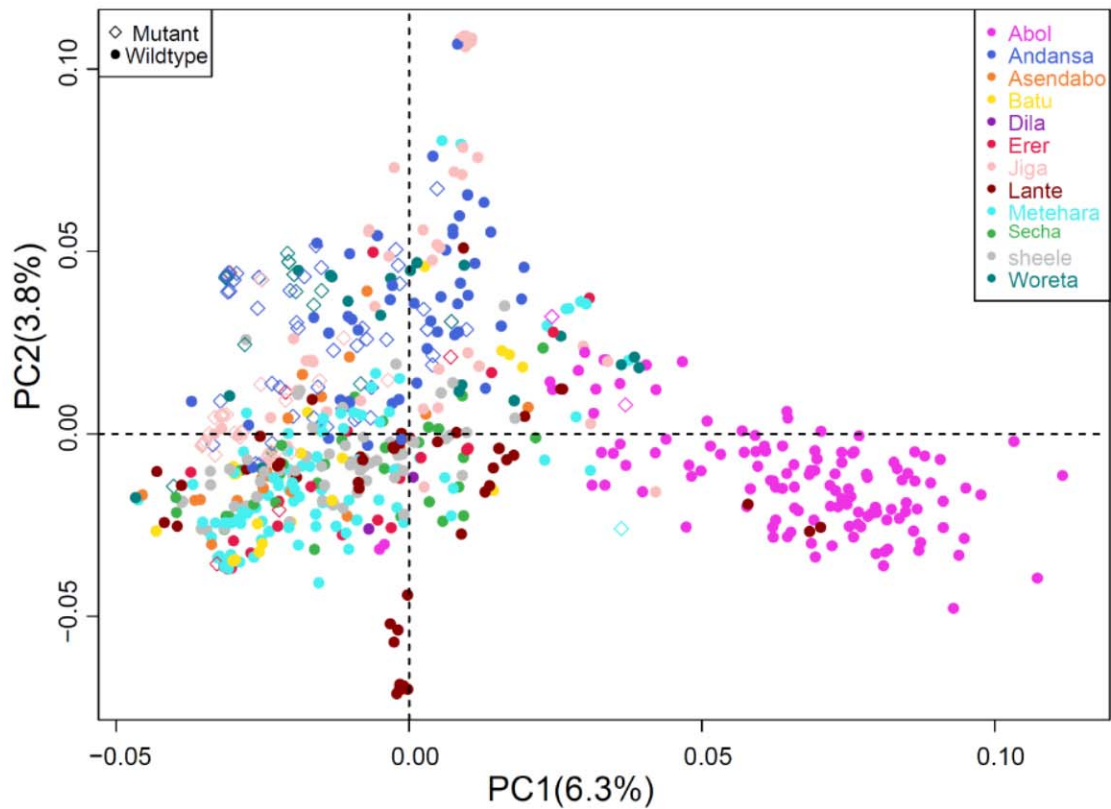

752

753 **Figure S7. Population structure of *P. falciparum* populations per 622I mutation**  
754 **and Health facility level across five regions in Ethiopia.** Colors indicate geographic  
755 sample origins and shapes indicate mutation status. Each diamond or dot indicates  
756 individual parasites. Percentage of variance explained by each PCA presented in each  
757 plot.

758

759

760

761

762

763

764

765

766

767

768

769 **Supplementary tables**

770



771 **To assess and view easily all supplementary tables compiled in one excel sheet.**

772

773 **Table S1.** Details of samples sequenced per region, health facility and year of sample  
774 collection.

775

776 **Table S2.** Metadata and genotype file for all successfully sequenced samples for drug  
777 resistance loci. Only successfully sequenced samples were used for drug resistance  
778 marker prevalence estimates. 0=Reference call (Wildtype), 1=Alternative heterozygous  
779 call (Mixed mutant), 2=Alternative homozygous call (Pure mutant), -1=Missing call. Note  
780 that the number of samples successfully genotyped varies per locus drug resistance  
781 MIP panel.

782

783 **Table S3.** Prevalence of key mutation per health facility, n=number samples sequenced  
784 at each health center and % prevalence of key mutation.

785

786 **Table S4.** List of molecular inversion probes (IBC2CORE MIPs) designed targeting  
787 genome-wide geographic informative SNPs.
